# Supplementary material for: Distinct shed microvesicle and exosome microRNA signatures reveal diagnostic markers for colorectal cancer
Source: PubMed Central journal article supplement (PMC6319712; doi:10.1371/journal.pone.0210003), 2019-01-04

**SW480-CL-R1**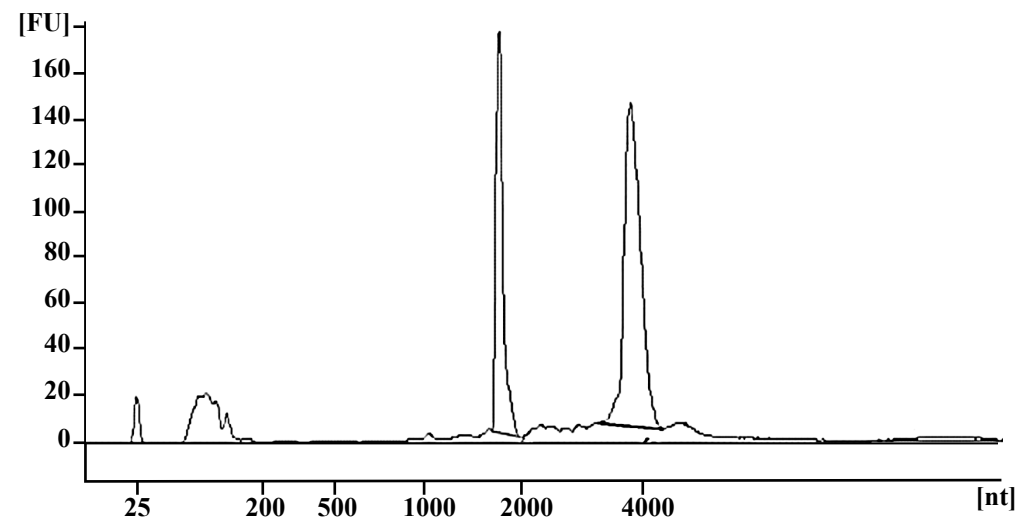**SW480-sMVs-R1**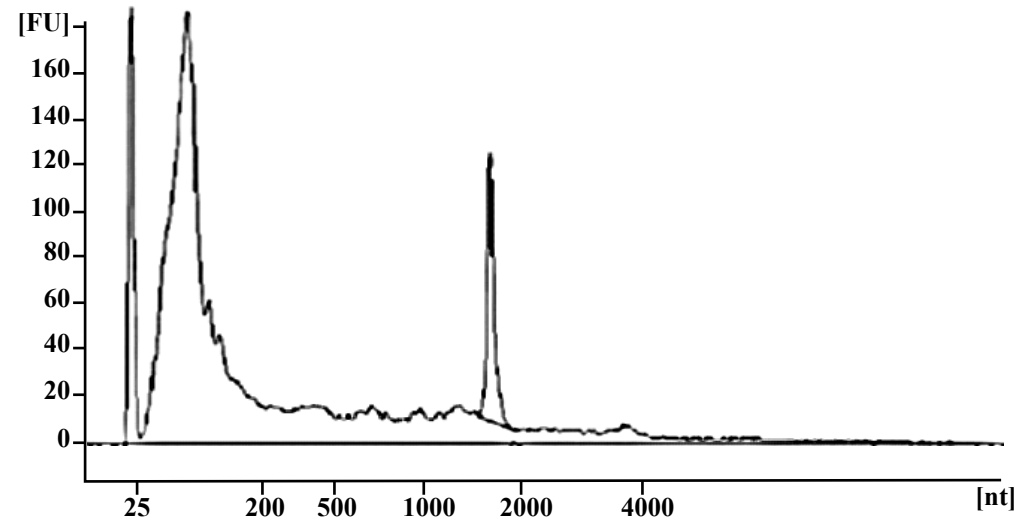**SW480-Exos-R1**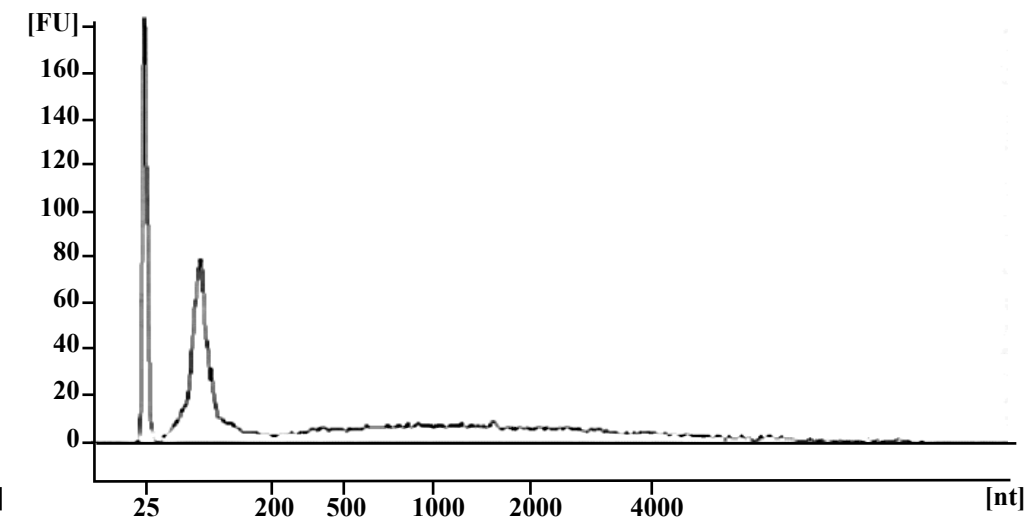**SW480-CL-R2**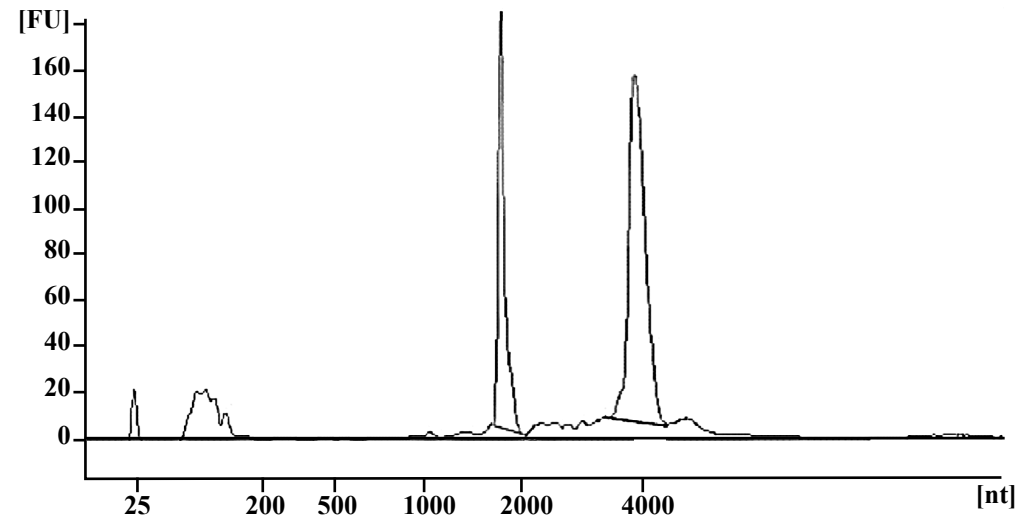**SW480-sMVs-R2**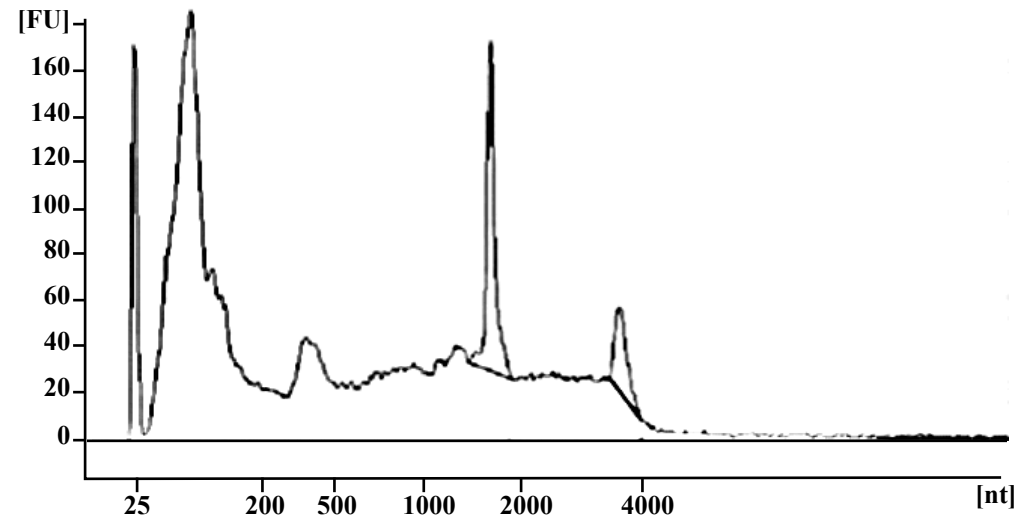**SW480-Exos-R2**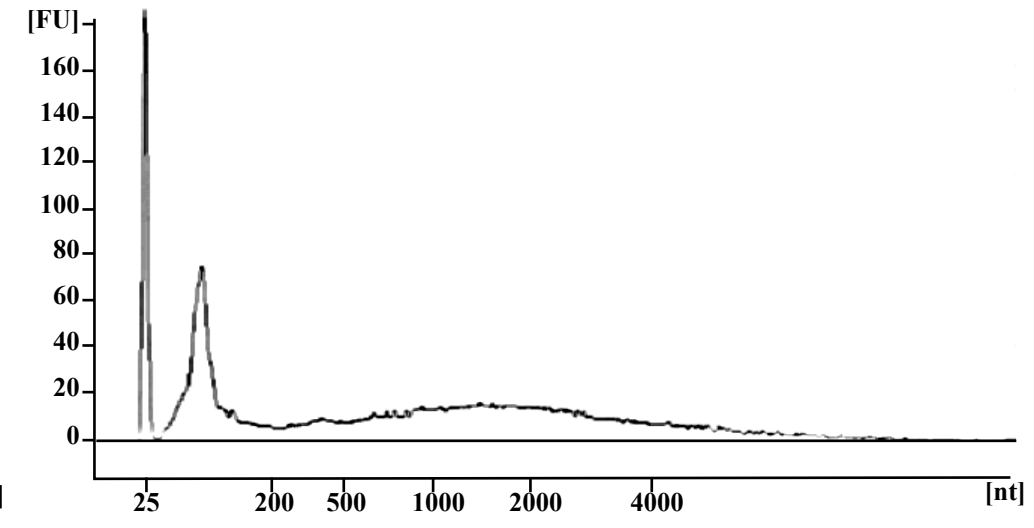**SW620-CL-R1**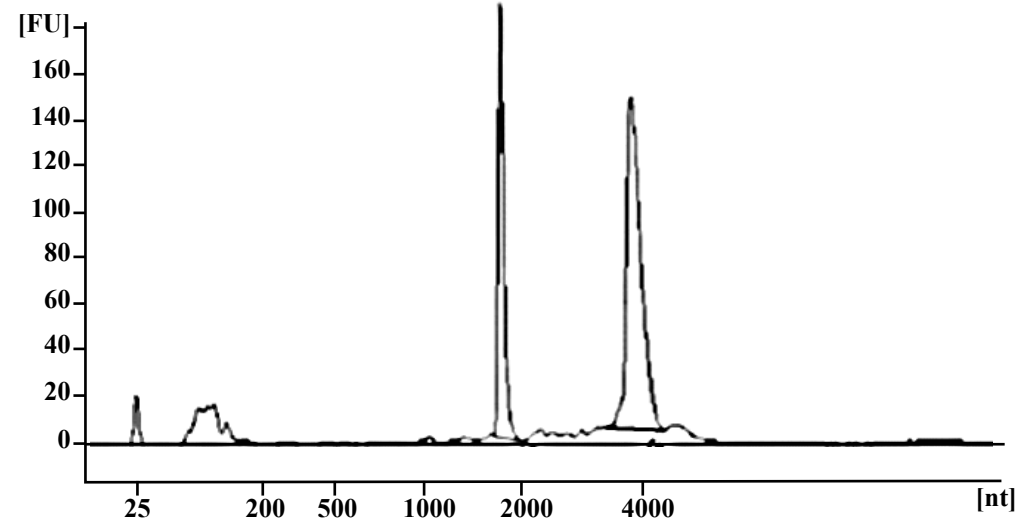**SW620-sMVs-R1**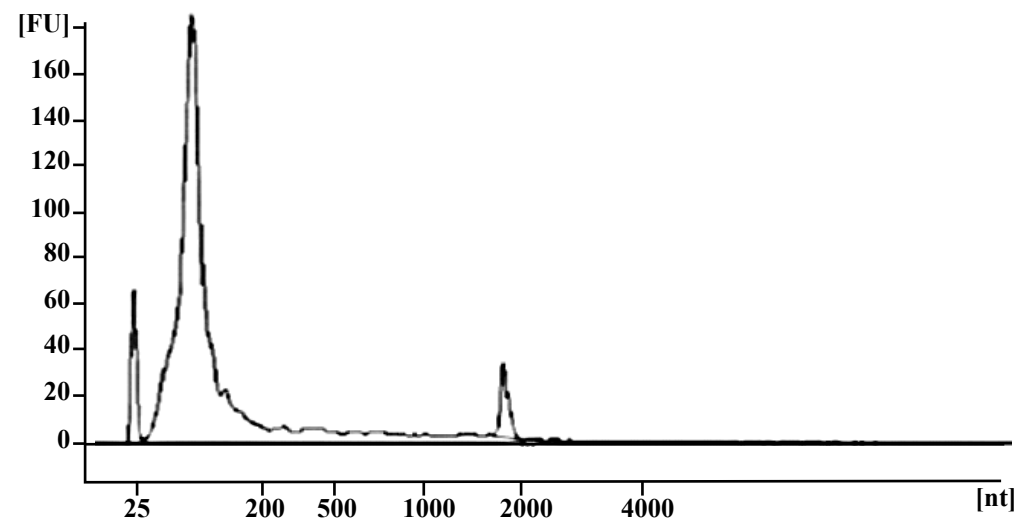**SW620-Exos-R1**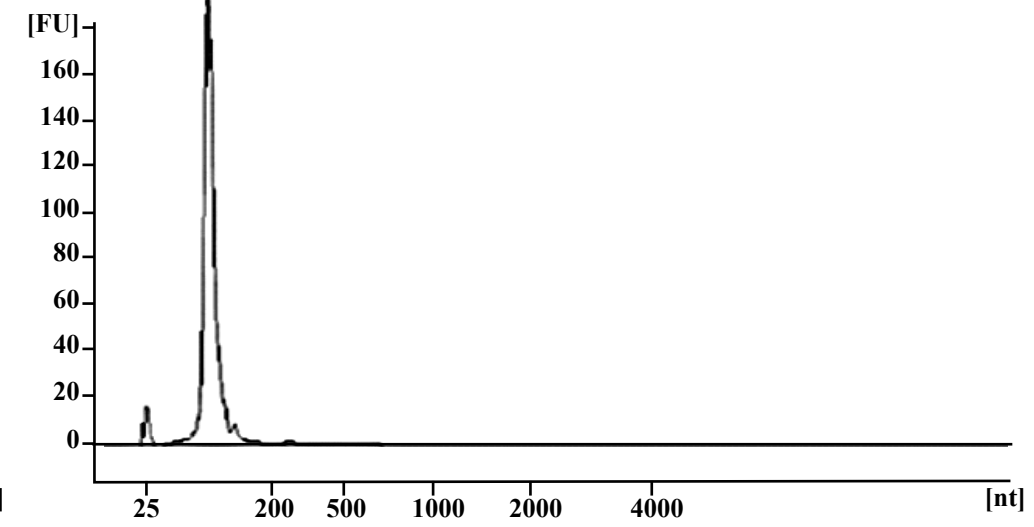**SW620-CL-R2**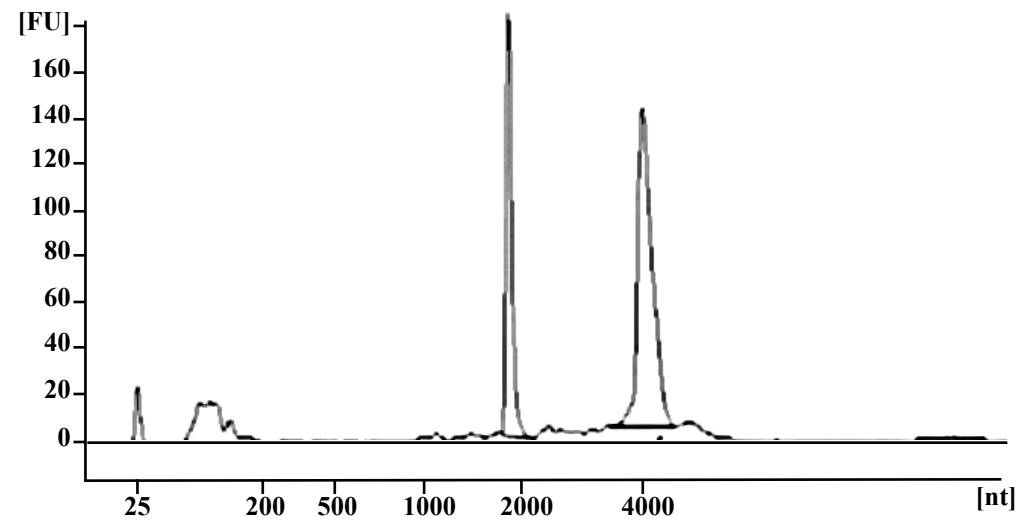**SW620-sMVs-R2**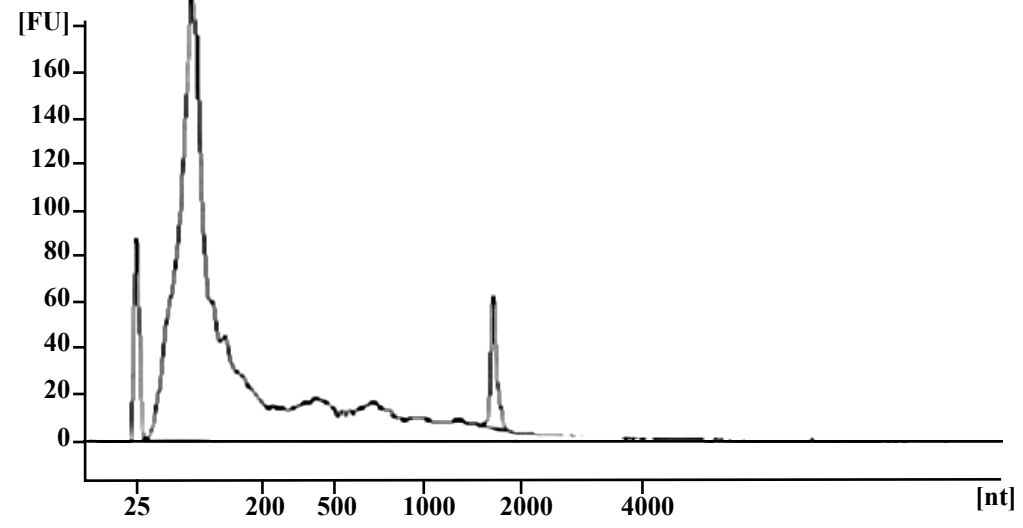**SW620-Exos-R2**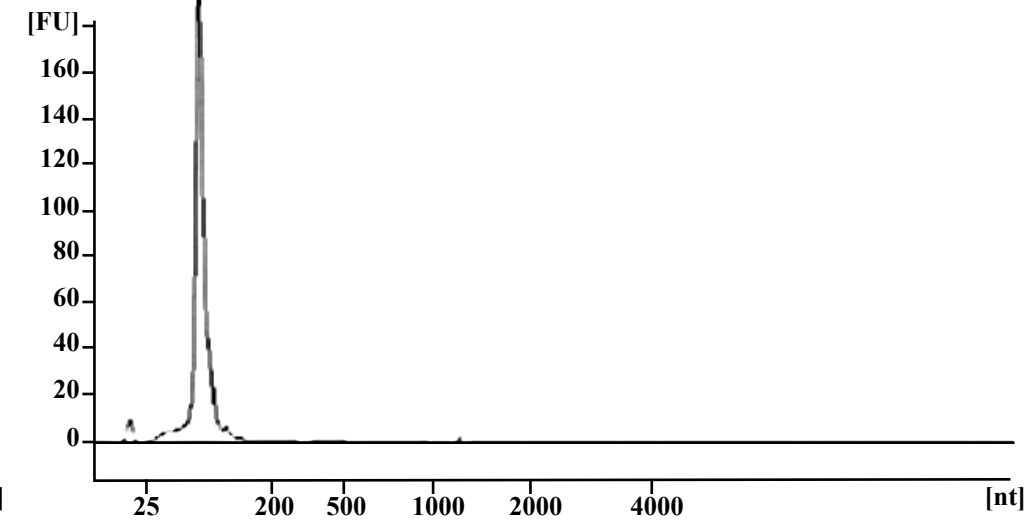

Supplement: pone.0210003.s001.pdf [file pone.0210003.s001.pdf]
