# Supplementary material for: Distinct shed microvesicle and exosome microRNA signatures reveal diagnostic markers for colorectal cancer
Source: PubMed Central journal article supplement (PMC6319712; doi:10.1371/journal.pone.0210003), 2019-01-04
Supplement: pone.0210003.s003.pdf [file pone.0210003.s003.pdf]

**A**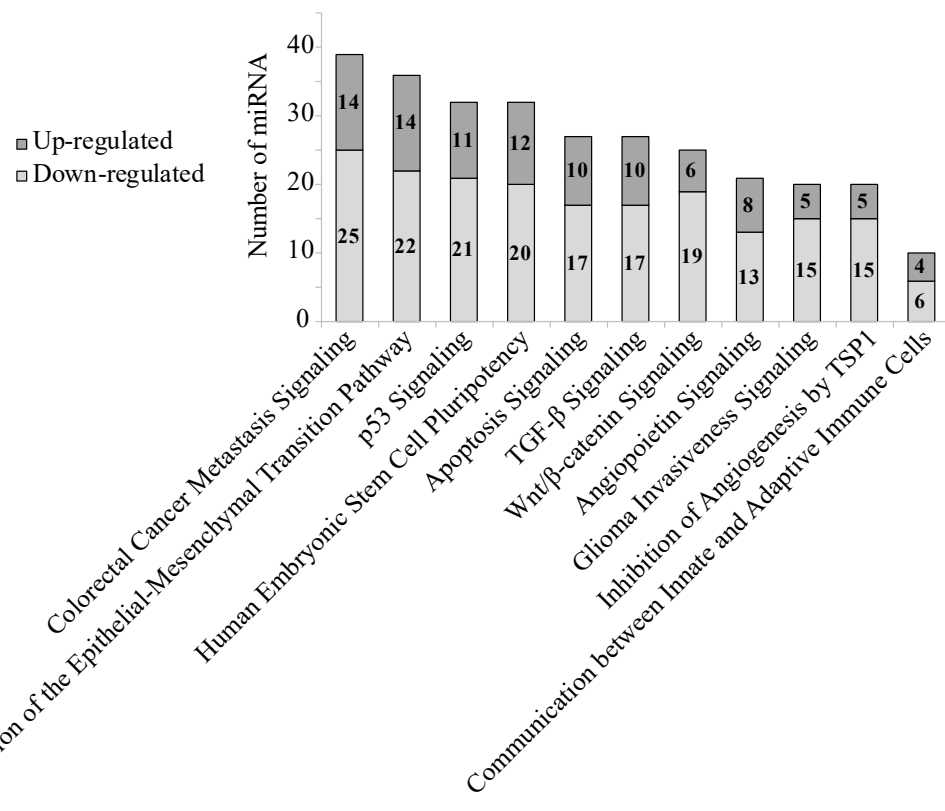**B**

| miRNA              | Colorectal Cancer Metastasis Signaling             | p53 Signaling                              | Wnt/ $\beta$ -catenin Signaling |
|--------------------|----------------------------------------------------|--------------------------------------------|---------------------------------|
| hsa-miR-125b-5p    | SMO, TP53                                          | CASP6, CDKN2A, PERP, TP53                  | CDH5, CDKN2A, SMO, TP53         |
| hsa-miR-17-5p      | CCND1, JAK1, MMP3, STAT3, TGFBR2, TLR7, TNF, VEGFA | BCL2, CCND1, CDKN1A, E2F1, PTEN, RB1, TP63 | BMPR2, CCND1, TGFBR2            |
| hsa-miR-181a-5p    | KRAS, MMP14                                        | BCL2                                       | NLK                             |
| hsa-miR-19a-3p     | CCND1                                              | CCND1, PTEN, THBS1                         | BMPR2, CCND1                    |
| hsa-miR-100-5p     | FGFR3                                              | FGFR3                                      |                                 |
| hsa-miR-1271-5p    | ADCY6, IRS1                                        | IRS1                                       |                                 |
| hsa-miR-142-3p*    | ADCY9, BCL2L1                                      | BCL2L1                                     |                                 |
| hsa-miR-135a-5p    | APC, JAC2                                          |                                            | APC                             |
| hsa-miR-199b-3p*   | PTGS2                                              |                                            | CD44                            |
| hsa-miR-125b-1-3p* | TNF                                                |                                            |                                 |
| hsa-miR-140-5p     | SMAD3, VEGFA                                       |                                            |                                 |
| hsa-miR-18a-3p*    | KRAS                                               |                                            |                                 |
| hsa-miR-301b-3p    | SMAD4                                              |                                            |                                 |
| hsa-miR-375        | JAK2                                               |                                            |                                 |
| hsa-miR-153-3p     |                                                    | BCL2                                       |                                 |
| hsa-miR-18a-5p     |                                                    | BCL2                                       |                                 |
| hsa-miR-199b-5p    |                                                    | HIF1A, SIRT1                               |                                 |
| hsa-miR-486-5p     |                                                    | PTEN                                       |                                 |
