# Supplementary material for: Distinct shed microvesicle and exosome microRNA signatures reveal diagnostic markers for colorectal cancer
Source: PubMed Central journal article supplement (PMC6319712; doi:10.1371/journal.pone.0210003), 2019-01-04

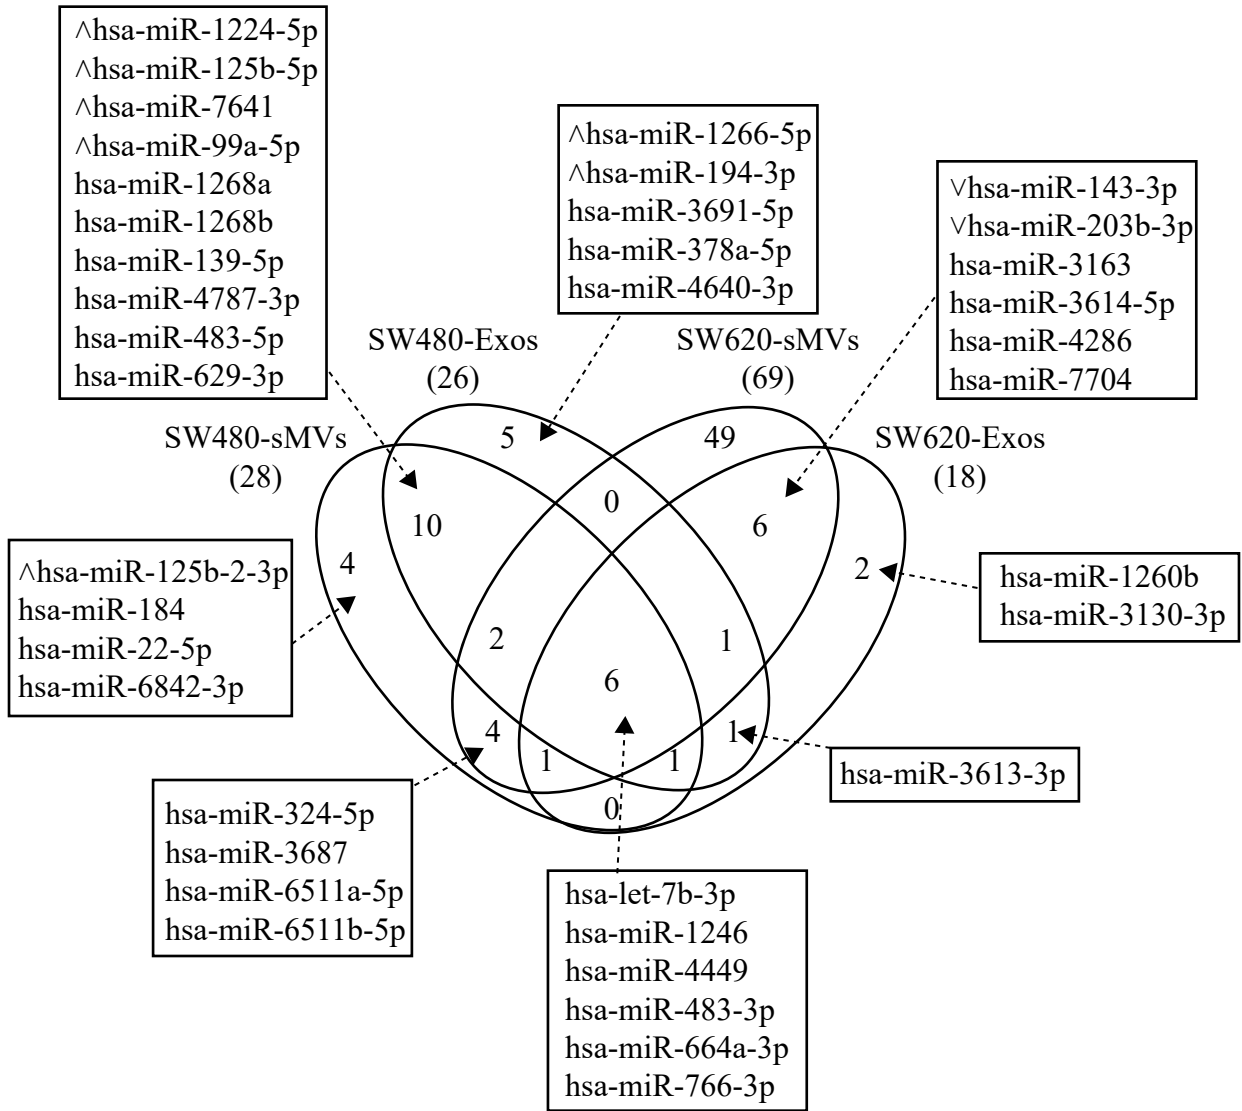

Supplement: pone.0210003.s004.pdf [file pone.0210003.s004.pdf]
